# Supplementary material
Source: publisher site journal article supplement (https://www.dovepress.com/get_supplementary_file.php?f=344299.docx)
Supplement: Supplementary file 1 [file get_supplementary_file.php]

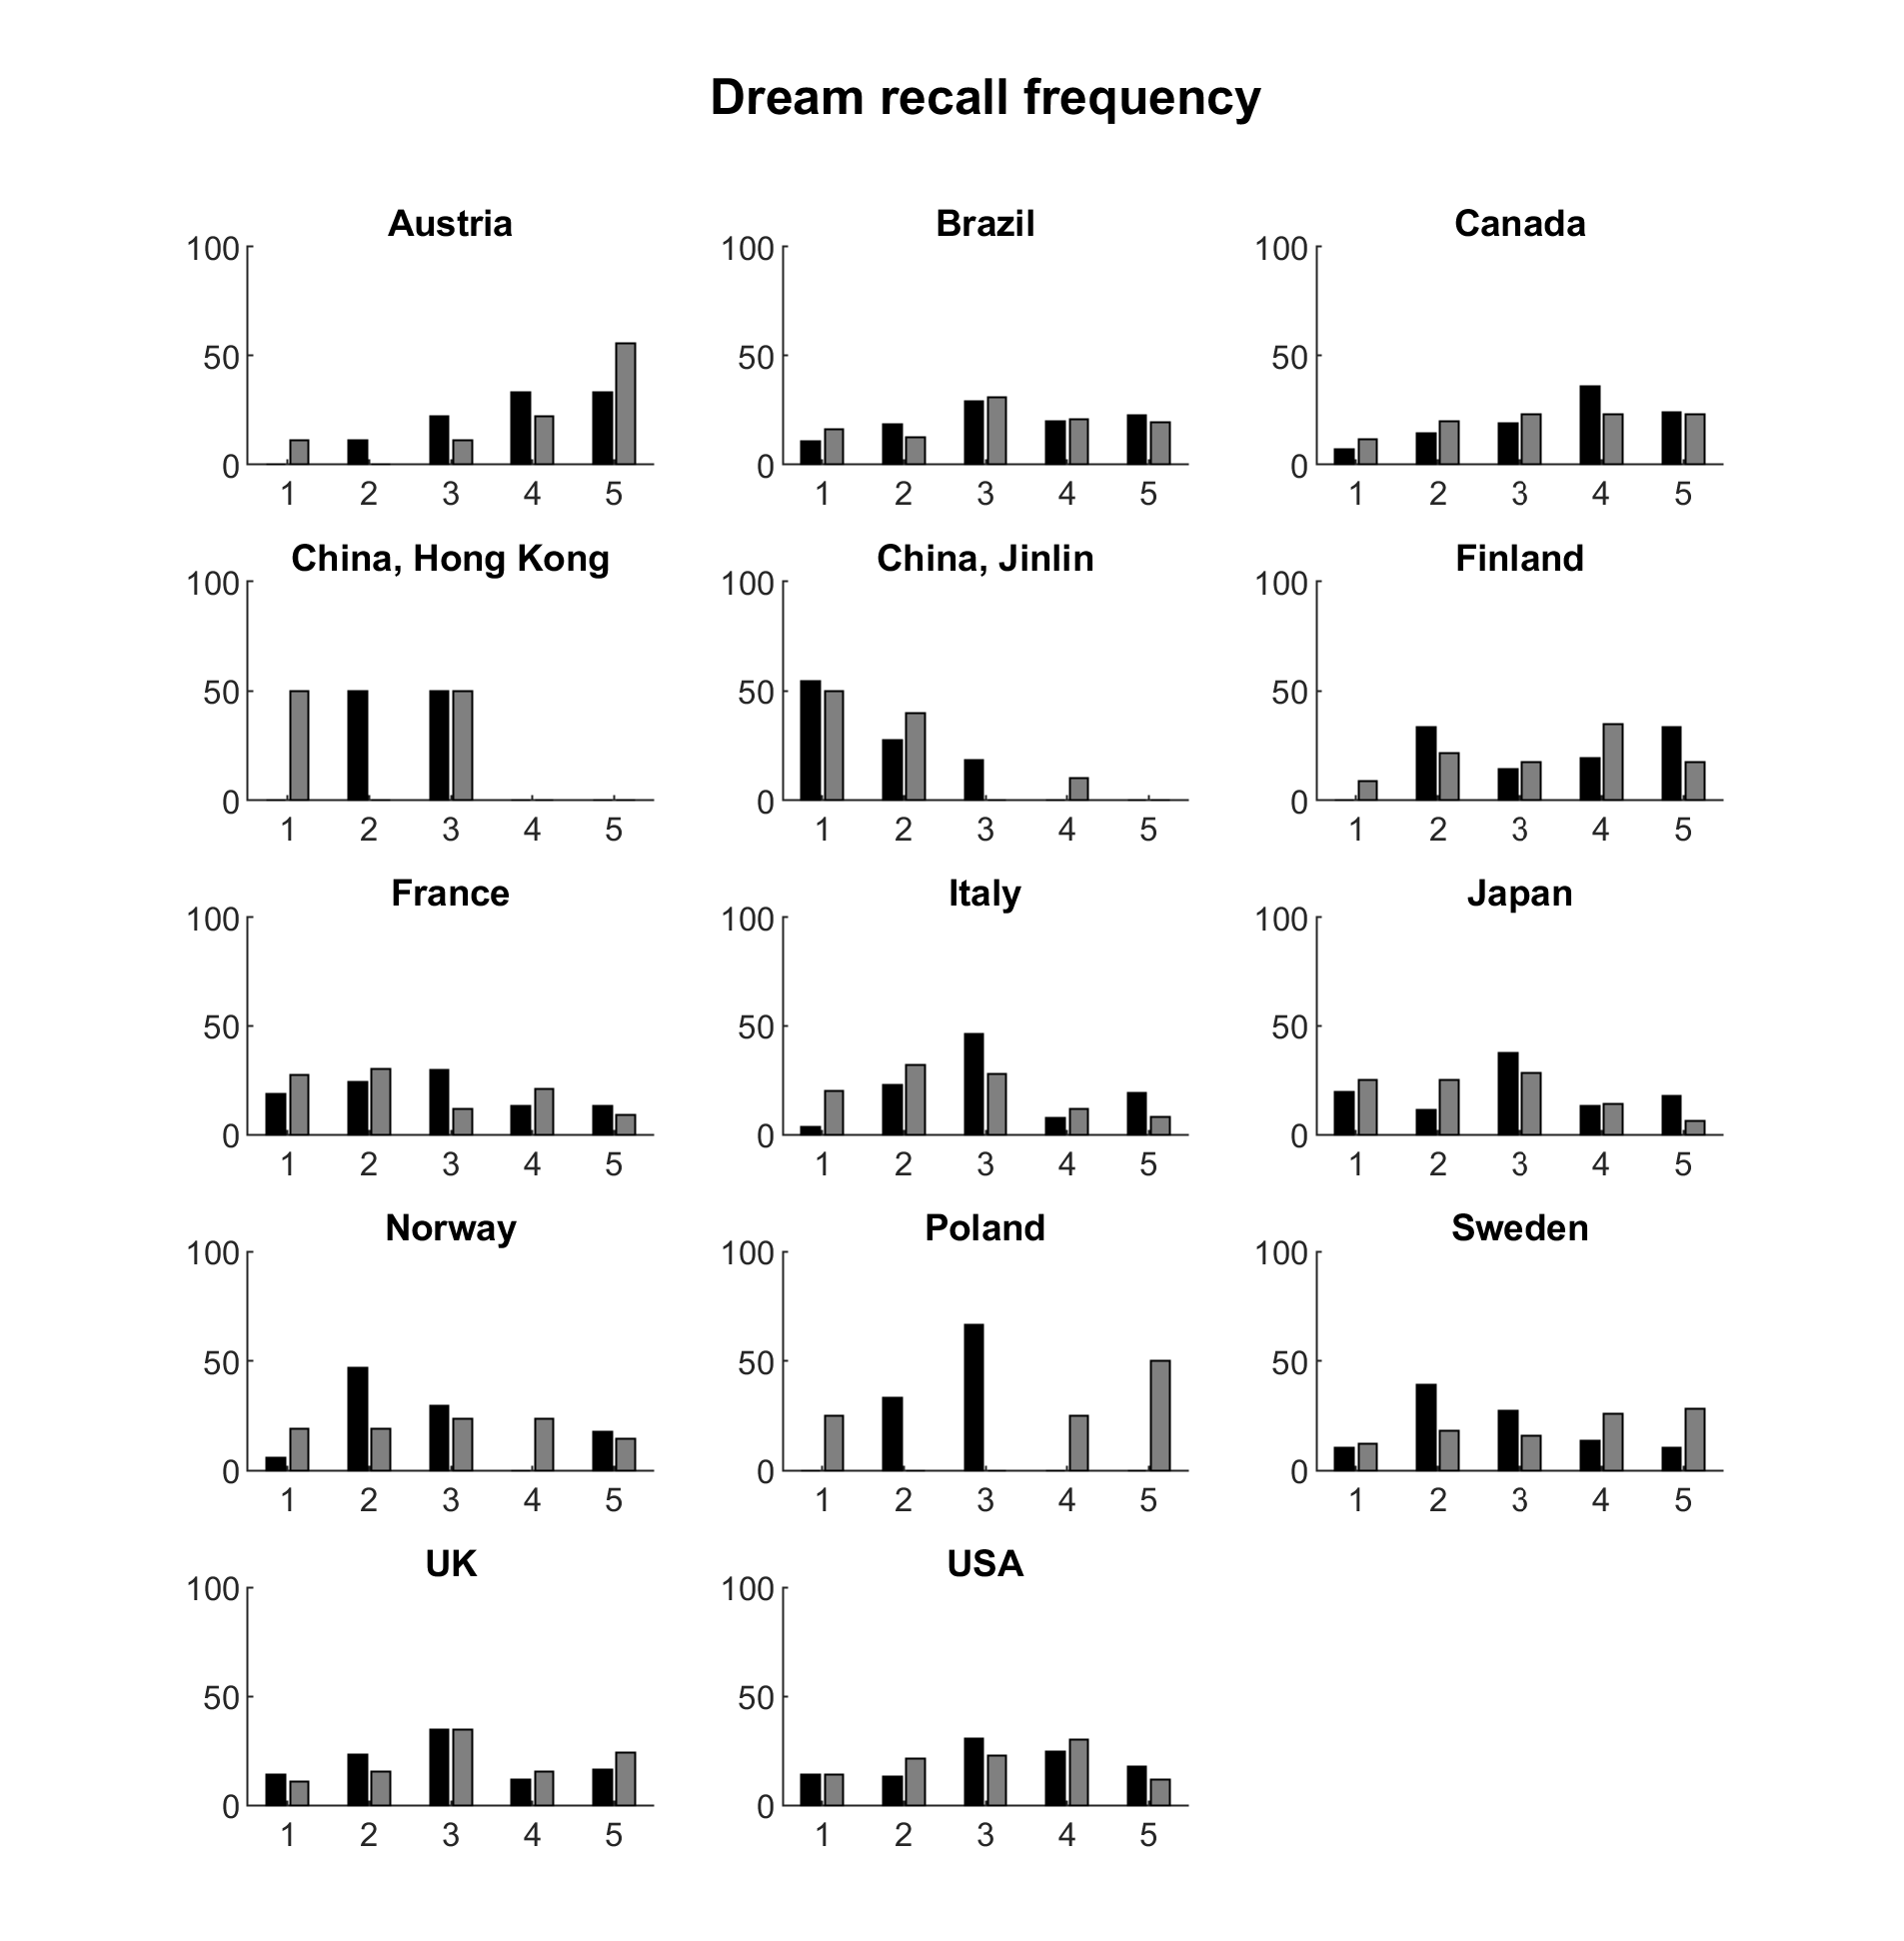


**Figure S1. Dream recall frequency across different countries**

The figure shows descriptive data (percentages) of dream recall frequency across different countries, Black bars indicate control participants, while grey bars indicate COVID-19 participants.


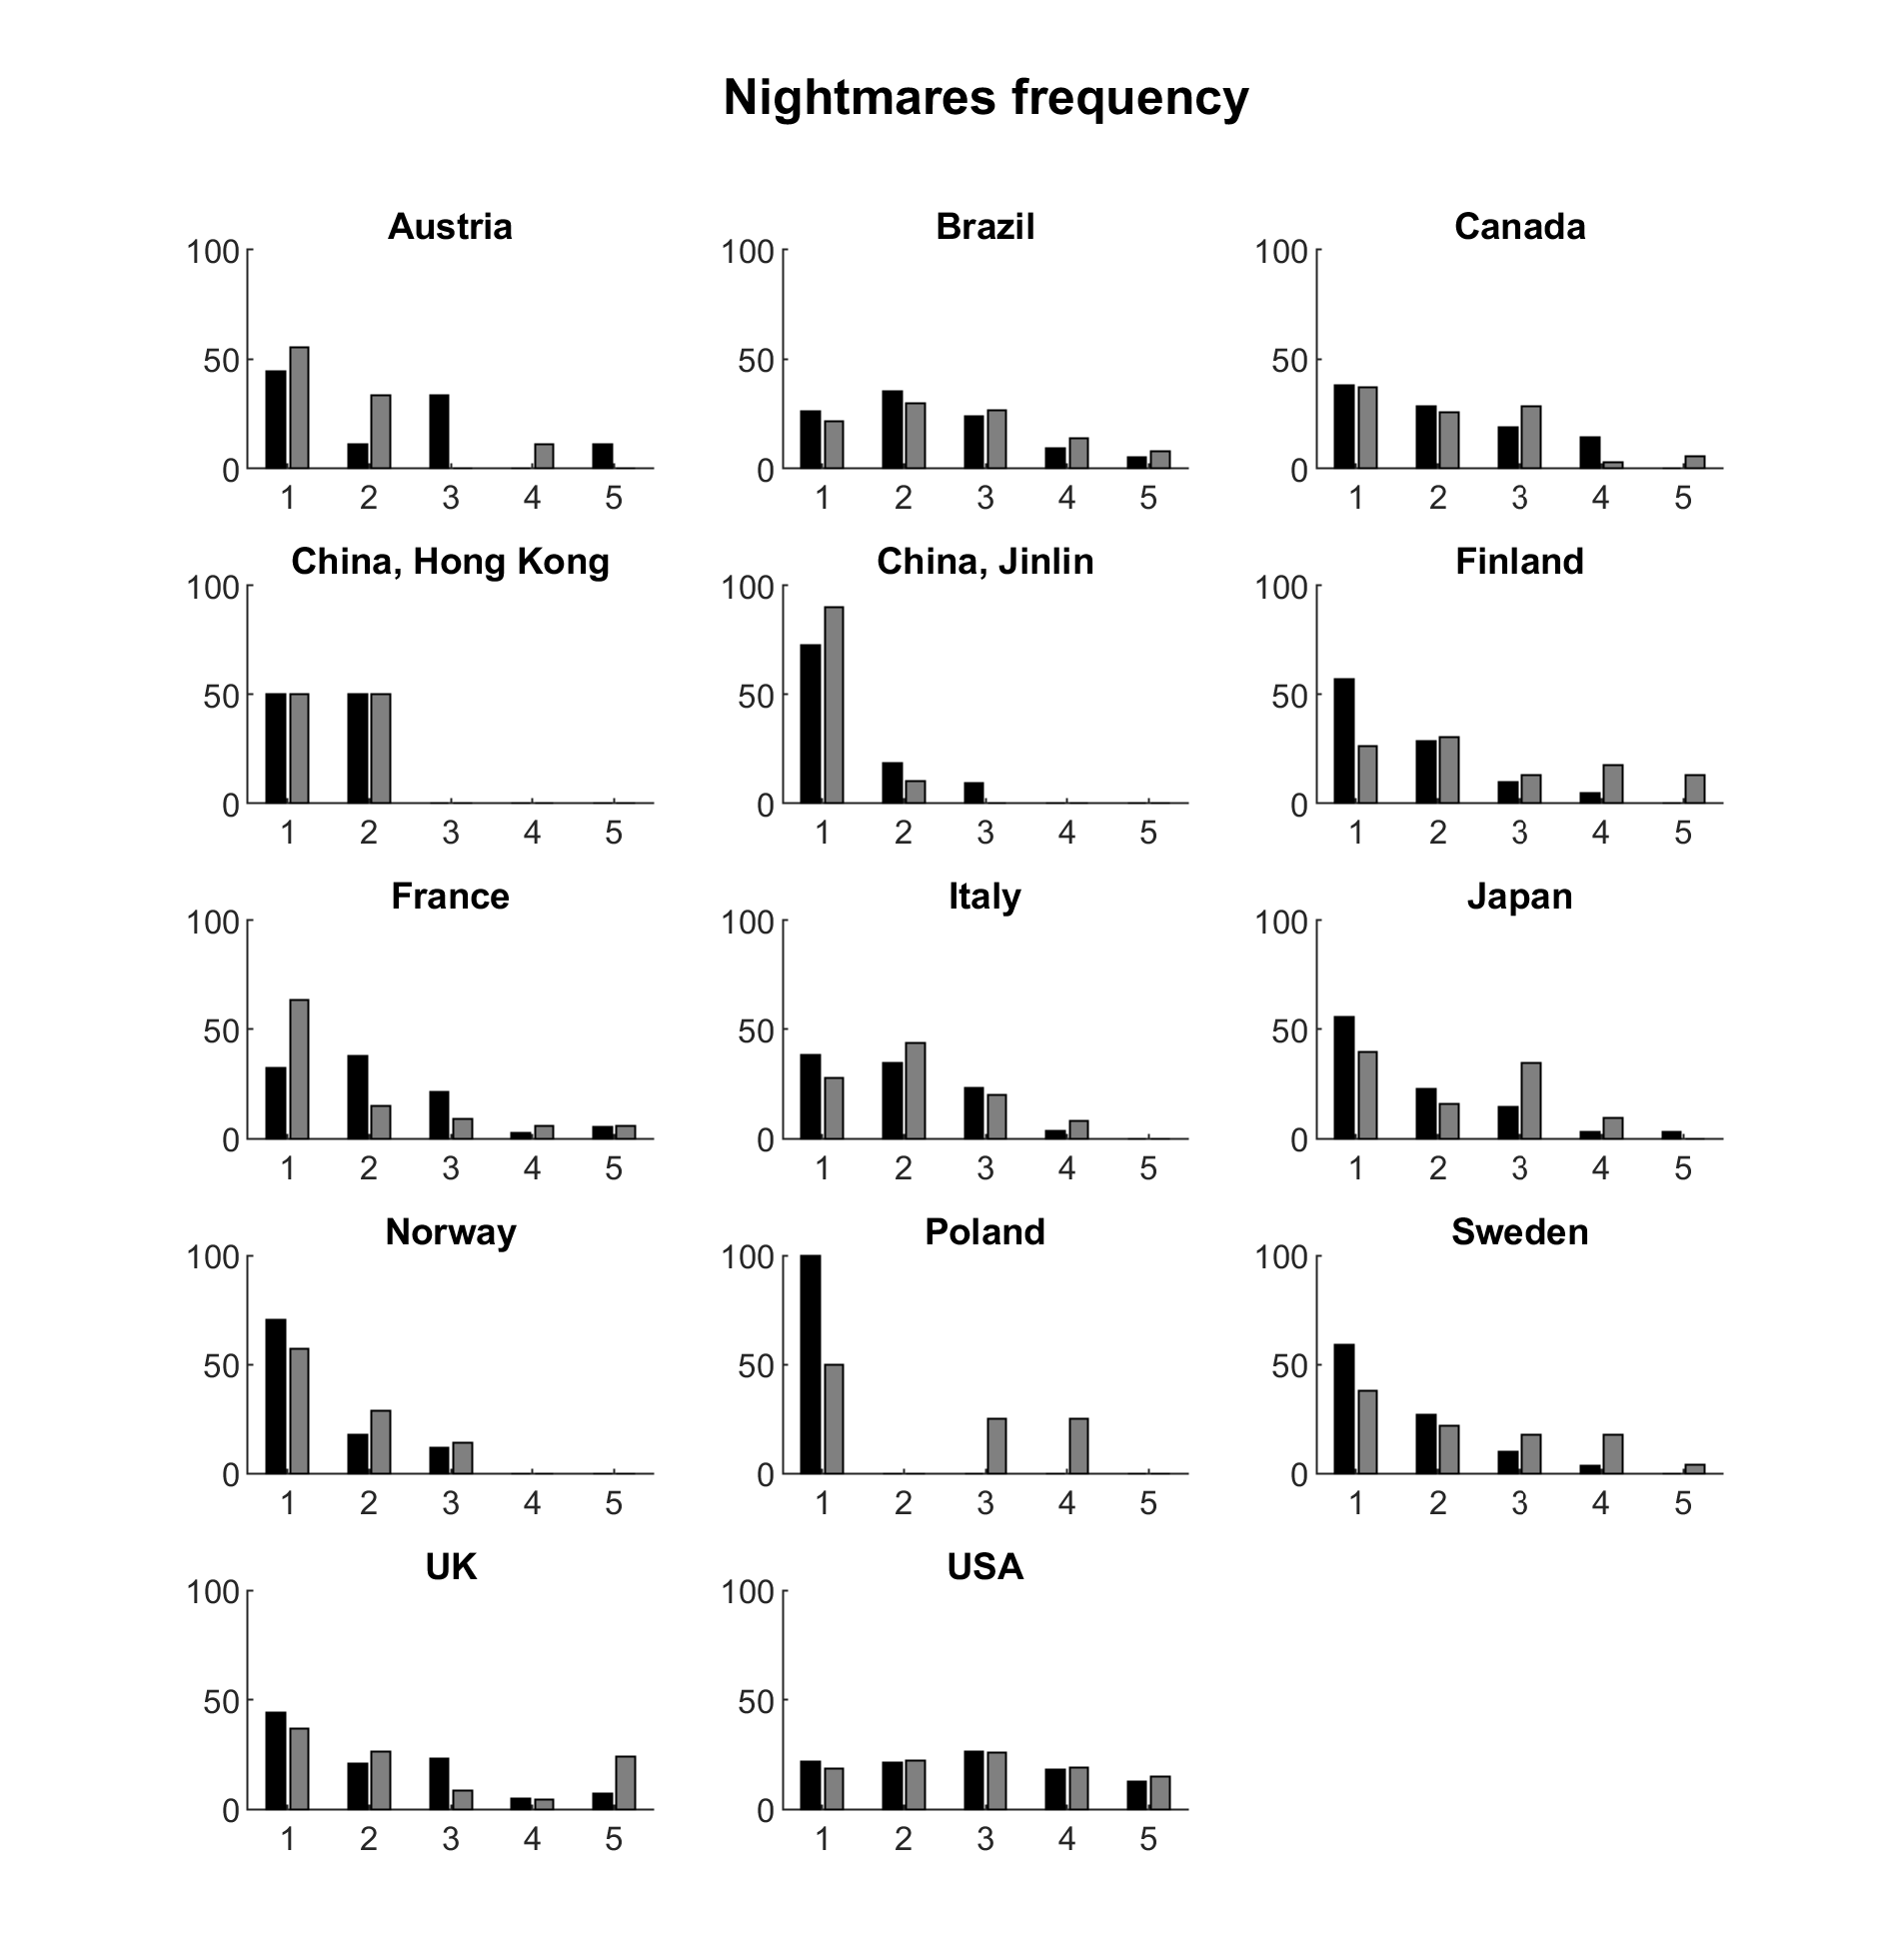


**Figure S2. Nightmares frequency across different countries**

The figure shows descriptive data (percentages) of nightmares frequency across different countries, Black bars indicate control participants, while grey bars indicate COVID-19 participants.

**Table S1. Mean rank of dream measures and results of statistical comparisons (Wilcoxon Test) between pre-pandemic and pandemic period, separately for controls and COVID-19 participants (Controls N=544; COVID-19 participants = 544)**

|  | **Mean positive rank** | **Z** | **p** |
| --- | --- | --- | --- |
| **Controls** | ***DRF***  ***(pandemic - prepandemic period)*** | 112.30 | -6.27 | **<0.001** |
| **NF**  ***(pandemic - prepandemic period*** | 106.52 | -08.00 | **<0.001** |
|  |
| **COVID-19 participants** | ***DRF***  ***(pandemic - prepandemic period)*** | 147.98 | -5.57 | **<0.001** |
| **NF**  ***(pandemic - prepandemic period*** | 128.62 | -8.23 | **<0.001** |
|  |

*DRF, Dream Recall Frequency; NF, Nightmare Frequency*

*Significant values were indicated in bold*

**Table S2. Mean rank of dream measures and results of statistical comparisons (Mann-Whitney U Test) between controls and COVID-19 participants (Controls N=544; COVID-19 participants= 544)**

|  |  | **Mean Rank** | **Z** | **p** |
| --- | --- | --- | --- | --- |
| **Pre-pandemic period** | **DRF** | Controls | 551.61 | -0.766 | 0.444 |
|  | COVID-19 participants | 537.39 |
| **NF** | Controls | 529.38 | -1.71 | 0.087 |
|  |  | COVID-19 participants | 559.62 |
|  | **DRF** | Controls | 551.23 | -0.72 | 0.470 |
| **Pandemic period** |  | COVID-19 participants | 537.77 |
| **NF** | Controls | 517.23 | -2.98 | **0.003** |
|  | COVID-19 participants | 571.77 |

*DRF, Dream Recall Frequency; NF, Nightmare Frequency*

*Significant values are indicated in bold*
